# Supplementary material for: Analysis of proteome dynamics inside the silk gland lumen of Bombyx mori
Source: PubMed Central journal article supplement (PMC4840313; doi:10.1038/srep21158), 2016-04-22
Supplement: srep21158-s1.pdf [file srep21158-s1.pdf]

**Analysis of proteome dynamics inside the silk gland lumen  
of *Bombyx mori***

Zhaoming Dong, Ping Zhao, Yan Zhang, Qianru Song, Xiaolu Zhang, Pengchao Guo,  
Dandan Wang, Qingyou Xia

State Key Laboratory of Silkworm Genome Biology, Southwest University, 2,  
Tiansheng Road, Beibei, Chongqing 400716, China

Corresponding author: Qingyou Xia

E-mail: [xiaqy@swu.edu.cn](mailto:xiaqy@swu.edu.cn)



**Supplementary Table S1. Proteins in the silk gland lumen that showed greatest change.**

| Classification              | Protein IDs                 | Seq. Description                                        | Signal peptides | Unique peptides | Mol. weight [kDa] | Average iBAQ V-5 ASG | Average iBAQ V-5 A-MSG | Average iBAQ V-5 M-MSG | Average iBAQ V-5 P-MSG |
|-----------------------------|-----------------------------|---------------------------------------------------------|-----------------|-----------------|-------------------|----------------------|------------------------|------------------------|------------------------|
| fibroin                     | >gi 164448672 ref NP_00110  | fibroin heavy chain                                     | Yes             | 22              | 391.59            | 11.2023              | 23.5259                | 46.5913                | 49.3623                |
| fibroin                     | >BGIBMGA009393-PA           | pep: fibroin light chain                                | Yes             | 2               | 27.669            | 4.89483              | 12.2029                | 14.2716                | 19.1357                |
| fibroin                     | >BGIBMGA001347-PA           | pep: fibroin p25                                        | Yes             | 4               | 25.149            | 0.75448              | 2.69821                | 4.67651                | 5.72846                |
| sericin                     | >gi 66774164 sp P07856.2 SI | sericin 1                                               | Yes             | 33              | 119.48            | 0.15925              | 1.35464                | 11.4649                | 5.61292                |
| sericin                     | >gi 282848475 gb ADA8414    | sericin 2                                               | Yes             | 22              | 198.65            | 22.5824              | 22.4088                | 0.32582                | 0.00131                |
| sericin                     | >gi 157889130 dbj BAF8102   | sericin 3                                               | Yes             | 61              | 123.3             | 0                    | 0.02063                | 0.01202                | 0                      |
| seroin                      | >BGIBMGA002689-PA           | pep: seroin 1                                           | Yes             | 11              | 7.6522            | 0.624                | 1.14196                | 2.94803                | 3.37803                |
| protein of unknown function | >BGIBMGA001358-PA           | pep: glycine-rich cell wall structural protein 1.0-like | Yes             | 5               | 18.534            | 0                    | 0                      | 0.72146                | 1.44464                |
| protein of unknown function | >gi 512891160 ref XP_00492  | fibroin p25-like                                        | Yes             | 17              | 27.201            | 0                    | 0                      | 0                      | 0.03285                |
| protein of unknown function | >BGIBMGA000013-PA           | pep: osiris 9-like                                      | Yes             | 23              | 25.909            | 0                    | 0.00153                | 1.87315                | 0.72017                |
| protein of unknown function | >gi 512894896 ref XP_00492  | uncharacterized protein LOC101739721                    | Yes             | 16              | 32.624            | 7.60583              | 0.83066                | 0.00344                | 0                      |
| protease inhibitor          | >gi 112983122 ref NP_00103  | serine protease inhibitor kunitz type BmSPI51           | Yes             | 4               | 8.4446            | 0                    | 0.02622                | 0.48875                | 0.84577                |
| protease inhibitor          | >gi 164448666 ref NP_00110  | carboxypeptidase inhibitor                              | Yes             | 9               | 12.561            | 0.112                | 0.20045                | 3.23185                | 2.72701                |
| protease inhibitor          | >gi 512898429 ref XP_00492  | serine protease inhibitor TIL-type BmSPI39              | Yes             | 7               | 22.654            | 0.29941              | 0.27594                | 1.33397                | 0.00612                |
| protease inhibitor          | >BGIBMGA009094-PA           | pep: serine protease inhibitor TIL-type BmSPI38         | Yes             | 4               | 8.765             | 3.82442              | 1.36325                | 0.12153                | 0                      |
| protease inhibitor          | >BGIBMGA003292-PA           | pep: serine protease inhibitor serpin-type BmSPI16      | Yes             | 27              | 44.367            | 6.73155              | 7.9832                 | 0.0608                 | 0                      |
| extracellular matrix        | >BGIBMGA010231-PA           | pep: cuticular protein RR-2 motif 68                    | Yes             | 14              | 31.754            | 4.2265               | 0                      | 0                      | 0                      |
| extracellular matrix        | >BGIBMGA011721-PA           | pep: cuticular protein hypothetical 21                  | Yes             | 1               | 14.647            | 1.06957              | 0.00067                | 0                      | 0                      |
| Enzyme                      | >BGIBMGA009211-PA           | pep: juvenile hormone epoxide hydrolase 1               | Yes             | 4               | 57.55             | 1.58481              | 0.53185                | 0.00065                | 0                      |
| Enzyme                      | >BGIBMGA000158-PA           | pep: glucose dehydrogenase/ecdysone oxidase 1           | Yes             | 36              | 61.805            | 1.81478              | 1.08039                | 0.0087                 | 0                      |
| Enzyme                      | >gi 512903792 ref XP_00492  | carboxylesterase/juvenile hormone esterase 1            | Yes             | 26              | 64.261            | 2.58311              | 0.54398                | 0.00203                | 0                      |
| Enzyme                      | >BGIBMGA005696-PA           | pep: beta-fructofuranosidase                            | Yes             | 29              | 55.941            | 1.92511              | 1.30775                | 0.00138                | 0                      |
| Enzyme                      | >BGIBMGA005827-PA           | pep: 15-hydroxyprostaglandin dehydrogenase 1            | Yes             | 5               | 31.689            | 8.42937              | 6.31263                | 0.02508                | 0                      |

| Average iBAQ V-5 PSG | Average iBAQ W-1 ASG | Average iBAQ W-1 A-MSG | Average iBAQ W-1 M-MSG | Average iBAQ W-1 P-MSG | Average iBAQ W-1 PSG | Increment of ASG (%) | Increment of A-MSG (%) | Increment of M-MSG (%) | Increment of P-MSG (%) | Increment of PSG (%) | P value of ASG | P value of A-MSG | P value of M-MSG | P value of P-MSG | P value of PSG |
|----------------------|----------------------|------------------------|------------------------|------------------------|----------------------|----------------------|------------------------|------------------------|------------------------|----------------------|----------------|------------------|------------------|------------------|----------------|
| 58.7832              | 33.454               | 26.3769                | 36.468                 | 49.1513                | 54.0121              | 22.2517              | 2.85097                | -10.123                | -0.21101               | -4.77117             | 0.00003164     | 0.26472457       | 0.00705742       | 0.91786041       | 0.04423657     |
| 20.0815              | 15.2222              | 13.723                 | 12.8493                | 17.2044                | 23.243               | 10.3273              | 1.52014                | -1.4224                | -1.93126               | 3.16155              | 0.00001879     | 0.25261101       | 0.02415370       | 0.13340324       | 0.10568031     |
| 4.91792              | 4.96875              | 4.86664                | 4.99928                | 6.30386                | 8.13544              | 4.21428              | 2.16843                | 0.32277                | 0.5754                 | 3.21753              | 0.00000581     | 0.16087441       | 0.58123745       | 0.35929723       | 0.00088454     |
| 0.44859              | 19.4926              | 10.5391                | 12.463                 | 4.38027                | 0.00538              | 19.3333              | 9.18442                | 0.9981                 | -1.23265               | -0.44321             | 0.00002002     | 0.00264770       | 0.29538398       | 0.09485384       | 0.00000002     |
| 0.00873              | 0.40636              | 0.07381                | 0                      | 0                      | 0.16825              | -22.176              | -22.335                | -0.3258                | -0.00131               | 0.15951              | 0.00000027     | 0.00001094       | 0.00014480       | 0.03436757       | 0.00844351     |
| 0                    | 4.51428              | 2.46146                | 0.27159                | 0                      | 0.00013              | 4.51428              | 2.44083                | 0.25956                | 0                      | 0.00013              | 0.00185330     | 0.01499474       | 0.00067326       | —                | 0.12167875     |
| 2.44471              | 5.20269              | 3.02172                | 7.11501                | 7.97551                | 4.78194              | 4.57869              | 1.87976                | 4.16698                | 4.59748                | 2.33723              | 0.00005390     | 0.00128920       | 0.00543385       | 0.00423656       | 0.00040852     |
| 0.75841              | 1.81354              | 1.17735                | 9.6001                 | 5.9768                 | 1.0318               | 1.81354              | 1.17735                | 8.87864                | 4.53216                | 0.27339              | 0.06179071     | 0.08632440       | 0.00097179       | 0.18377742       | 0.62954080     |
| 0                    | 0                    | 0                      | 1.64942                | 1.52271                | 0                    | 0                    | 0                      | 1.64942                | 1.48986                | 0                    | —              | —                | 0.00184889       | 0.00030836       | —              |
| 0.00197              | 2.50557              | 4.59                   | 6.09109                | 0.97692                | 7.9E-05              | 2.50557              | 4.58848                | 4.21795                | 0.25675                | -0.00189             | 0.00000089     | 0.00043607       | 0.00002915       | 0.21277500       | 0.12899186     |
| 0                    | 0.00117              | 5.7E-05                | 0                      | 0                      | 0.00113              | -7.6047              | -0.8306                | -0.0034                | 0                      | 0.00113              | 0.00000959     | 0.00054399       | 0.00789436       | —                | 0.04374748     |
| 0.69372              | 3.23595              | 14.5549                | 2.51358                | 2.35571                | 1.57569              | 3.23595              | 14.5287                | 2.02484                | 1.50994                | 0.88196              | 0.00130531     | 0.02119380       | 0.02040723       | 0.00186983       | 0.01927212     |
| 3.14308              | 0.09551              | 1.86435                | 0.8486                 | 0.27663                | 0.30257              | -0.0165              | 1.6639                 | -2.3833                | -2.45038               | -2.84051             | 0.29163047     | 0.00005288       | 0.00045303       | 0.00286762       | 0.00000575     |
| 0                    | 1.32322              | 4.05566                | 1.30174                | 0.63902                | 0.00129              | 1.0238               | 3.77972                | -0.0322                | 0.63291                | 0.00129              | 0.01606950     | 0.00063481       | 0.94395639       | 0.00458520       | 0.25041215     |
| 0                    | 0.0042               | 0.17221                | 0.05602                | 0                      | 0                    | -3.8202              | -1.191                 | -0.0655                | 0                      | 0                    | 0.00000574     | 0.00813691       | 0.02307520       | —                | —              |
| 0.00013              | 0.11842              | 0.13486                | 0.00048                | 0.00193                | 0.01733              | -6.6131              | -7.8483                | -0.0603                | 0.00193                | 0.0172               | 0.00000001     | 0.00001830       | 0.00028650       | 0.00001581       | 0.00344366     |
| 0                    | 0.00296              | 0                      | 0                      | 0                      | 0.09309              | -4.2235              | 0                      | 0                      | 0                      | 0.09309              | 0.00000370     | —                | —                | —                | 0.00004432     |
| 0                    | 0.01961              | 0                      | 0                      | 0                      | 0.0008               | -1.05                | -0.0007                | 0                      | 0                      | 0.0008               | 0.00220550     | 0.37390097       | —                | —                | 0.15472160     |
| 0                    | 0                    | 0                      | 0                      | 0                      | 0.00012              | -1.5848              | -0.5319                | -0.0006                | 0                      | 0.00012              | 0.00000034     | 0.00041892       | 0.00186571       | —                | 0.37390097     |
| 0                    | 0                    | 0                      | 0                      | 0                      | 0.0001               | -1.8148              | -1.0804                | -0.0087                | 0                      | 0.0001               | 0.00000054     | 0.00011032       | 0.00030352       | —                | 0.14106875     |
| 0                    | 0.00349              | 2.3E-05                | 0                      | 0                      | 0.00042              | -2.5796              | -0.544                 | -0.002                 | 0                      | 0.00042              | 0.00000326     | 0.00384795       | 0.00019838       | —                | 0.00885740     |
| 0                    | 0.00417              | 0.00054                | 0                      | 0                      | 0.00105              | -1.9209              | -1.3072                | -0.0014                | 0                      | 0.00105              | 0.00000405     | 0.00001261       | 0.00241896       | —                | 0.00336939     |
| 0.0001               | 0.00508              | 0.00017                | 0                      | 0                      | 0.01748              | -8.4243              | -6.3125                | -0.0251                | 0                      | 0.01738              | 0.00000031     | 0.00119267       | 0.00041993       | —                | 0.01305040     |

**Supplementary Table S2. Hormone metabolism enzymes in the silk gland lumen.**

| Classification                      | Protein IDs                | Seq. Description                                  | Transmembrane region | Signal peptides | Peptides | Razor + unique peptides | Unique peptides |
|-------------------------------------|----------------------------|---------------------------------------------------|----------------------|-----------------|----------|-------------------------|-----------------|
| juvenile hormone metabolism enzymes | >BGIBMGA013812-PA pep      | juvenile hormone esterase-like protein 2          | –                    | Yes             | 45       | 45                      | 43              |
| juvenile hormone metabolism enzymes | >BGIBMGA012031-PA pep      | juvenile hormone esterase-like protein 7          | –                    | Yes             | 20       | 20                      | 19              |
| juvenile hormone metabolism enzymes | >BGIBMGA007546-PA pep      | juvenile hormone esterase-like protein 3          | –                    | Yes             | 25       | 25                      | 24              |
| juvenile hormone metabolism enzymes | >gi 512903792 ref XP_00492 | juvenile hormone esterase                         | –                    | Yes             | 33       | 33                      | 26              |
| juvenile hormone metabolism enzymes | >BGIBMGA000775-PA pep      | juvenile hormone esterase-like protein 6          | –                    | –               | 18       | 12                      | 3               |
| juvenile hormone metabolism enzymes | >gi 512931403 ref XP_00493 | juvenile hormone esterase-like protein 5          | –                    | –               | 21       | 21                      | 21              |
| juvenile hormone metabolism enzymes | >gi 512903970 ref XP_00492 | juvenile hormone esterase-like protein 8          | –                    | –               | 12       | 3                       | 3               |
| juvenile hormone metabolism enzymes | >BGIBMGA010976-PA pep      | juvenile hormone esterase-like protein 4          | –                    | –               | 33       | 32                      | 2               |
| juvenile hormone metabolism enzymes | >gi 512934081 ref XP_00493 | juvenile hormone esterase-like protein 9          | –                    | –               | 12       | 11                      | 11              |
| juvenile hormone metabolism enzymes | >gi 114052306 ref NP_00104 | juvenile hormone esterase-like protein 10         | –                    | –               | 10       | 10                      | 9               |
| juvenile hormone metabolism enzymes | >BGIBMGA007670-PA pep      | juvenile hormone esterase-like protein 11         | Yes                  | –               | 4        | 4                       | 4               |
| juvenile hormone metabolism enzymes | >BGIBMGA013930-PA pep      | juvenile hormone epoxide hydrolase                | –                    | Yes             | 4        | 4                       | 4               |
| juvenile hormone metabolism enzymes | >BGIBMGA009211-PA pep      | juvenile hormone epoxide hydrolase-like protein 2 | –                    | Yes             | 18       | 18                      | 4               |
| juvenile hormone metabolism enzymes | >BGIBMGA011438-PA pep      | juvenile hormone epoxide hydrolase-like protein 3 | –                    | –               | 9        | 9                       | 9               |
| ecdysone metabolism enzymes         | >BGIBMGA000158-PA pep      | ecdysone oxidase                                  | –                    | Yes             | 36       | 36                      | 36              |
| ecdysone metabolism enzymes         | >gi 512917383 ref XP_00492 | ecdysone oxidase-like protein 2                   | –                    | –               | 36       | 36                      | 36              |
| ecdysone metabolism enzymes         | >BGIBMGA010515-PA pep      | ecdysone oxidase-like protein 3                   | –                    | –               | 34       | 34                      | 13              |
| ecdysone metabolism enzymes         | >BGIBMGA005710-PA pep      | ecdysone oxidase-like protein 4                   | –                    | –               | 29       | 28                      | 28              |
| ecdysone metabolism enzymes         | >gi 512938073 ref XP_00493 | ecdysone oxidase-like protein 5                   | –                    | –               | 32       | 11                      | 10              |
| ecdysone metabolism enzymes         | >BGIBMGA013006-PA pep      | ecdysone oxidase-like protein 7                   | –                    | Yes             | 27       | 27                      | 27              |
| ecdysone metabolism enzymes         | >BGIBMGA005711-PA pep      | ecdysone oxidase-like protein 6                   | –                    | –               | 17       | 15                      | 15              |
| ecdysone metabolism enzymes         | >BGIBMGA009925-PA pep      | ecdysone oxidase-like protein 8                   | –                    | –               | 7        | 7                       | 7               |
| ecdysone metabolism enzymes         | >BGIBMGA013193-PA pep      | 3-dehydroecdysone 3 alpha-reductase               | –                    | –               | 4        | 4                       | 4               |
| ecdysone metabolism enzymes         | >BGIBMGA009799-PA pep      | 3-dehydroecdysone 3 beta-reductase-like protein 1 | –                    | –               | 21       | 21                      | 19              |
| ecdysone metabolism enzymes         | >gi 512901370 ref XP_00492 | 3-dehydroecdysone 3 beta-reductase-like protein 2 | –                    | –               | 9        | 9                       | 9               |

| Sequence coverage [%] | Mol. weight [kDa] | PEP       | Normalized iBAQ V-5 ASG1 | Normalized iBAQ V-5 ASG2 | Normalized iBAQ V-5 ASG3 | Normalized iBAQ V-5 A-MSG1 | Normalized iBAQ V-5 A-MSG2 | Normalized iBAQ V-5 A-MSG3 | Normalized iBAQ V-5 M-MSG1 | Normalized iBAQ V-5 M-MSG2 | Normalized iBAQ V-5 M-MSG3 | Normalized iBAQ V-5 P-MSG1 | Normalized iBAQ V-5 P-MSG2 | Normalized iBAQ V-5 P-MSG3 | Normalized iBAQ V-5 PSG1 | Normalized iBAQ V-5 PSG2 |         |
|-----------------------|-------------------|-----------|--------------------------|--------------------------|--------------------------|----------------------------|----------------------------|----------------------------|----------------------------|----------------------------|----------------------------|----------------------------|----------------------------|----------------------------|--------------------------|--------------------------|---------|
| 53.5                  | 63.296            |           | 0                        | 0.03989                  | 0.04793                  | 0.04229                    | 0.15424                    | 0.0975                     | 0.11679                    | 0.23829                    | 0.24306                    | 0.19372                    | 0.0188                     | 0.01722                    | 0.01489                  | 0.00129                  | 0.00127 |
| 42.4                  | 61.415            | 4.99E-142 | 0.02617                  | 0.0179                   | 0.02378                  | 0.00118                    | 0.00066                    | 0.00103                    | 0.00027                    | 0.00243                    | 0.00036                    | 0.0002                     | 0.00011                    | 0.00011                    |                          | 0                        | 0       |
| 40.2                  | 61.701            | 0         | 0.49486                  | 0.57272                  | 0.58266                  | 0.08478                    | 0.07225                    | 0.09019                    | 0.00643                    | 0.00897                    | 0.0083                     | 0.00012                    | 0                          | 0                          | 0                        | 0                        | 0       |
| 55.3                  | 64.261            | 0         | 2.53434                  | 2.72132                  | 2.49368                  | 0.47938                    | 0.42997                    | 0.7226                     | 0.00232                    | 0.00178                    | 0.002                      | 0                          | 0                          | 0                          | 0                        | 0                        | 0       |
| 32.9                  | 63.58             | 0         | 0.01095                  | 0.01039                  | 0.0116                   | 0                          | 0                          | 0.00046                    | 0                          | 0                          | 0                          | 0                          | 0                          | 0                          | 0                        | 0                        | 0       |
| 48.7                  | 52.711            | 3.42E-111 | 0.00435                  | 0.00316                  | 0.0054                   | 0.00317                    | 0.00141                    | 0.00433                    | 0.01533                    | 0.00862                    | 0.01367                    | 9.3E-05                    | 0.00011                    | 9E-05                      |                          | 0                        | 0       |
| 27.5                  | 52.886            | 3.42E-142 | 0.00085                  | 0.00109                  | 0.00119                  | 0                          | 0                          | 0                          | 0                          | 0                          | 0                          | 0                          | 0                          | 0                          | 0                        | 0                        | 0       |
| 58.6                  | 61.127            | 3.65E-276 | 0                        | 0                        | 0                        | 0                          | 0                          | 0.00023                    | 0.03589                    | 0.03425                    | 0.02598                    | 0.02828                    | 0.02775                    | 0.03243                    | 0.00795                  | 0.00803                  |         |
| 23.6                  | 59.35             | 3.58E-27  | 0                        | 0                        | 0                        | 0                          | 0                          | 0                          | 0.0015                     | 0.00054                    | 0.00133                    | 0.00211                    | 0.0016                     | 0.00184                    | 0.00206                  | 0.00216                  |         |
| 14.2                  | 84.821            | 7.83E-62  | 0                        | 0                        | 0.0001                   | 0.00014                    | 0                          | 0.00011                    | 0.00018                    | 0                          | 0                          | 4.6E-05                    | 0                          | 0                          | 0                        | 0                        | 0       |
| 8.8                   | 64.224            | 1.91E-12  | 0                        | 0                        | 0                        | 0.0003                     | 0                          | 0                          | 0                          | 0                          | 0                          | 0.00011                    | 0.00013                    | 9.9E-05                    |                          | 0                        | 0       |
| 10.6                  | 52.496            | 8.05E-06  | 0                        | 0                        | 0                        | 0                          | 0                          | 0                          | 0                          | 0                          | 0                          | 0                          | 0                          | 0                          | 0                        | 0                        | 0       |
| 35.9                  | 57.55             | 0         | 1.53611                  | 1.61172                  | 1.60661                  | 0.46492                    | 0.5026                     | 0.62803                    | 0.0007                     | 0.00047                    | 0.00077                    | 0                          | 0                          | 0                          | 0                        | 0                        | 0       |
| 52.3                  | 22.373            | 7.66E-45  | 0                        | 0                        | 0.00043                  | 0                          | 0                          | 0                          | 0                          | 0                          | 0                          | 0.00285                    | 0.00115                    | 0.00175                    | 0.01106                  | 0.01433                  |         |
| 73.9                  | 61.805            | 0         | 1.82009                  | 1.75792                  | 1.86632                  | 1.052                      | 0.97364                    | 1.21553                    | 0.00907                    | 0.00726                    | 0.00975                    | 0                          | 0                          | 0                          | 0                        | 0                        | 0       |
| 63.2                  | 66.855            | 0         | 1.36287                  | 1.35309                  | 1.44854                  | 0.56962                    | 0.47219                    | 0.46693                    | 0                          | 0                          | 0                          | 0                          | 0                          | 0                          | 0                        | 0                        | 0       |
| 58                    | 57.577            | 0         | 0                        | 0                        | 0                        | 0                          | 0                          | 0                          | 0                          | 0                          | 0                          | 0                          | 0                          | 0                          | 0                        | 0                        | 0       |
| 52                    | 65.475            | 2.84E-292 | 0                        | 0                        | 0                        | 0                          | 0                          | 0                          | 0.00611                    | 0.0015                     | 0.00426                    | 0.00515                    | 0.00366                    | 0.00352                    |                          | 0                        | 0       |
| 60                    | 57.655            | 0         | 0                        | 0                        | 0                        | 0                          | 0                          | 0                          | 0                          | 0.00012                    | 0.00011                    | 0.00033                    | 0.00016                    | 0.00017                    |                          | 0                        | 0       |
| 27.9                  | 139.1             | 1.35E-177 | 0                        | 0                        | 0                        | 0                          | 0                          | 0                          | 0                          | 0                          | 0                          | 0                          | 0                          | 0                          | 0                        | 0                        | 0       |
| 37.9                  | 62.784            | 2.04E-106 | 0                        | 0                        | 0                        | 0                          | 0                          | 0                          | 0                          | 0                          | 0                          | 0                          | 0                          | 0                          | 0                        | 0                        | 0       |
| 11.6                  | 69.366            | 2.36E-11  | 0                        | 0                        | 0                        | 0                          | 0                          | 0                          | 0                          | 0                          | 0                          | 0                          | 0                          | 0                          | 0                        | 0                        | 0       |
| 19.3                  | 26.916            | 4.39E-19  | 0                        | 0                        | 0                        | 0                          | 0                          | 0                          | 0                          | 0                          | 0                          | 0                          | 0                          | 0                          | 0                        | 0                        | 0       |
| 38.4                  | 41.843            | 4.28E-105 | 0                        | 0                        | 0                        | 0                          | 0                          | 0                          | 0                          | 0                          | 0                          | 0                          | 0                          | 0                          | 0                        | 0                        | 0       |
| 30.6                  | 35.835            | 2.52E-17  | 0                        | 0                        | 0                        | 0                          | 0                          | 0                          | 0                          | 0                          | 0                          | 0                          | 0                          | 0                          | 0                        | 0.00031                  | 0.00022 |

| Normali<br>zed<br>iBAQ V-<br>5 PSG3 | Normali<br>zed<br>iBAQ<br>W-1<br>ASG1 | Normali<br>zed<br>iBAQ<br>W-1<br>ASG2 | Normali<br>zed<br>iBAQ<br>W-1<br>ASG3 | Normali<br>zed<br>iBAQ<br>W-1 A-<br>MSG1 | Normali<br>zed<br>iBAQ<br>W-1 A-<br>MSG2 | Normali<br>zed<br>iBAQ<br>W-1 A-<br>MSG3 | Normali<br>zed<br>iBAQ<br>W-1 M-<br>MSG1 | Normali<br>zed<br>iBAQ<br>W-1 M-<br>MSG2 | Normali<br>zed<br>iBAQ<br>W-1 M-<br>MSG3 | Normali<br>zed<br>iBAQ<br>W-1 P-<br>MSG1 | Normali<br>zed<br>iBAQ<br>W-1 P-<br>MSG2 | Normali<br>zed<br>iBAQ<br>W-1 P-<br>MSG3 | Normali<br>zed<br>iBAQ<br>W-1<br>PSG1 | Normali<br>zed<br>iBAQ<br>W-1<br>PSG2 | Normali<br>zed<br>iBAQ<br>W-1<br>PSG3 |         |
|-------------------------------------|---------------------------------------|---------------------------------------|---------------------------------------|------------------------------------------|------------------------------------------|------------------------------------------|------------------------------------------|------------------------------------------|------------------------------------------|------------------------------------------|------------------------------------------|------------------------------------------|---------------------------------------|---------------------------------------|---------------------------------------|---------|
| 0.00084                             | 0.39665                               | 0.29785                               | 0.33903                               | 0.83836                                  | 0.91176                                  | 1.09019                                  | 0.19231                                  | 0.24156                                  | 0.19603                                  | 0.00028                                  | 0.0002                                   | 0.00021                                  | 6.3E-05                               | 0                                     | 8.2E-05                               |         |
| 0                                   | 0.00012                               | 0.00013                               | 0.00042                               | 0.00011                                  | 0.00034                                  | 0.00036                                  | 0.00028                                  | 0.00028                                  | 0.00025                                  | 0                                        | 0                                        | 0                                        | 0                                     | 0                                     | 0                                     |         |
| 0                                   | 0.00675                               | 0.00599                               | 0.00442                               | 0.00176                                  | 0.00091                                  | 0.00114                                  | 0                                        | 0                                        | 0.00026                                  | 0                                        | 0                                        | 0                                        | 0                                     | 0                                     | 0                                     |         |
| 0                                   | 0.00598                               | 0.00141                               | 0.00308                               | 0                                        | 0                                        | 7E-05                                    | 0                                        | 0                                        | 0                                        | 0                                        | 0                                        | 0                                        | 0.0003                                | 0.00059                               | 0.00036                               |         |
| 0                                   | 0.01707                               | 0.01271                               | 0.0146                                | 0.00433                                  | 0.00579                                  | 0.0037                                   | 0                                        | 0                                        | 0                                        | 0                                        | 0                                        | 0                                        | 0                                     | 0                                     | 0                                     |         |
| 0                                   | 0.01009                               | 0.01169                               | 0.01121                               | 0.00254                                  | 0.00493                                  | 0.00659                                  | 0.00061                                  | 0.00147                                  | 0.00032                                  | 0                                        | 0                                        | 0                                        | 0                                     | 0                                     | 0                                     |         |
| 0                                   | 0.00344                               | 0.00454                               | 0.0029                                | 0                                        | 0.00053                                  | 0.0018                                   | 0                                        | 0                                        | 0                                        | 0                                        | 0                                        | 0                                        | 0                                     | 0                                     | 0                                     |         |
| 0.00992                             | 0.01971                               | 0.01808                               | 0.02007                               | 0.0119                                   | 0.01477                                  | 0.01644                                  | 0.0062                                   | 0.00883                                  | 0.00811                                  | 0                                        | 0                                        | 0                                        | 0                                     | 0                                     | 0                                     |         |
| 0.00171                             | 9.2E-05                               | 0                                     | 0                                     | 0                                        | 0                                        | 0.00187                                  | 0                                        | 0                                        | 0                                        | 0                                        | 0                                        | 0                                        | 0.00141                               | 0.00065                               | 0.00159                               |         |
| 0                                   | 0                                     | 0                                     | 0                                     | 0.00138                                  | 0.00154                                  | 0.00256                                  | 0                                        | 0                                        | 0                                        | 0                                        | 0                                        | 0                                        | 0                                     | 0                                     | 0                                     |         |
| 0                                   | 0                                     | 0                                     | 0                                     | 0                                        | 0                                        | 0                                        | 0                                        | 0                                        | 0                                        | 0                                        | 0                                        | 0                                        | 0                                     | 0                                     | 0                                     |         |
| 0                                   | 0                                     | 0                                     | 0                                     | 0                                        | 0.00012                                  | 0.00014                                  | 0                                        | 0                                        | 0                                        | 0                                        | 0                                        | 0                                        | 0                                     | 0                                     | 0                                     |         |
| 0                                   | 0                                     | 0                                     | 0                                     | 0                                        | 0                                        | 0                                        | 0                                        | 0                                        | 0                                        | 0                                        | 0                                        | 0                                        | 0                                     | 0.00035                               | 0                                     |         |
| 0.0153                              | 0                                     | 0.00136                               | 0                                     | 0.00038                                  | 0                                        | 0                                        | 0                                        | 0                                        | 0                                        | 0                                        | 0                                        | 0                                        | 0                                     | 0.0169                                | 0.0176                                | 0.01286 |
| 0                                   | 0                                     | 0                                     | 0                                     | 0                                        | 0                                        | 0                                        | 0                                        | 0                                        | 0                                        | 0                                        | 0                                        | 0                                        | 0                                     | 0.00019                               | 0.00012                               | 0       |
| 0                                   | 0.00222                               | 0.00308                               | 0.00238                               | 0.00017                                  | 0.0002                                   | 0.00015                                  | 0                                        | 0                                        | 0                                        | 0                                        | 0                                        | 0                                        | 0.00013                               | 0.00031                               | 0.00012                               |         |
| 0                                   | 0.11961                               | 0.13169                               | 0.12402                               | 0.0571                                   | 0.05118                                  | 0.06227                                  | 0                                        | 0                                        | 0                                        | 0                                        | 0                                        | 0                                        | 0                                     | 0                                     | 0                                     |         |
| 0                                   | 0.00137                               | 0.00116                               | 0.00113                               | 0.01795                                  | 0.01374                                  | 0.0262                                   | 0.00771                                  | 0.00444                                  | 0.00401                                  | 0                                        | 0                                        | 0                                        | 0                                     | 0                                     | 0                                     |         |
| 0                                   | 0.00884                               | 0.00818                               | 0.00793                               | 0.00473                                  | 0.00433                                  | 0.0048                                   | 0.00093                                  | 0                                        | 0.00209                                  | 0                                        | 0                                        | 0                                        | 0                                     | 0                                     | 0                                     |         |
| 0                                   | 0.00016                               | 0.00061                               | 4.5E-05                               | 0.00019                                  | 0.00021                                  | 3.4E-05                                  | 0.00316                                  | 0.00141                                  | 0.00127                                  | 0.00027                                  | 0.00039                                  | 0.00024                                  | 0                                     | 0                                     | 0                                     |         |
| 0                                   | 0                                     | 0                                     | 0                                     | 6.4E-05                                  | 0                                        | 0                                        | 0.00697                                  | 0.00116                                  | 0.00421                                  | 0                                        | 0                                        | 0                                        | 0                                     | 0                                     | 0                                     |         |
| 0                                   | 7.8E-05                               | 0.00021                               | 0.00032                               | 8.5E-05                                  | 0                                        | 0                                        | 0                                        | 0                                        | 0                                        | 0                                        | 0                                        | 0                                        | 0                                     | 0                                     | 0                                     |         |
| 0                                   | 0.00321                               | 0.0009                                | 0.00205                               | 0.00163                                  | 0.0029                                   | 0.00192                                  | 0                                        | 0                                        | 0                                        | 0                                        | 0                                        | 0                                        | 0                                     | 0                                     | 0                                     |         |
| 0                                   | 0.04946                               | 0.04059                               | 0.02765                               | 0.04815                                  | 0.05443                                  | 0.11589                                  | 0.00101                                  | 0                                        | 0                                        | 0                                        | 0                                        | 0                                        | 0.00028                               | 0.00062                               | 0.00101                               |         |
| 0.00073                             | 0.0007                                | 0.00078                               | 0.00099                               | 0.001                                    | 0.00087                                  | 0.00161                                  | 0                                        | 0                                        | 0                                        | 0                                        | 0                                        | 0                                        | 0.00086                               | 0.00101                               | 0.00098                               |         |

**Supplementary Table S3. Primer sequences, sizes of PCR products and melting temperature for semi-quantitative RT-PCR of hormone metabolism enzymes in the silk gland lumen.**

| Gene          | (5'-3') | Primer               | Size(bp) | Melting temperature(°C) |
|---------------|---------|----------------------|----------|-------------------------|
| BGIBMGA013930 | Forward | AAGCCATTCCTCATCTCAC  | 319      | 54                      |
|               | Reverse | AATAAGGCACCGACAAACT  |          |                         |
| BGIBMGA005322 | Forward | ATAATG TTCAGTGGGAGTG | 550      | 54                      |
|               | Reverse | TATGCGTGAATGCTATGTC  |          |                         |
| BGIBMGA013812 | Forward | GATGAAGGACCAAGTAGCC  | 301      | 58                      |
|               | Reverse | CCAATCTTTAGCCATGAGAC |          |                         |
| BGIBMGA012031 | Forward | AGAGTCCACAACCACCAG   | 361      | 54                      |
|               | Reverse | ACTTGATCCTTCAGTCCC   |          |                         |
| BGIBMGA007546 | Forward | CCTTTACCACCGCCAACA   | 503      | 56                      |
|               | Reverse | CCGCTACCTGCGATAACC   |          |                         |
| BGIBMGA000776 | Forward | GAAACCACCCACAGGAGC   | 441      | 56                      |
|               | Reverse | CTTTGAACCCAGCGTAGC   |          |                         |
| BGIBMGA009211 | Forward | CTTAGATGGCTGGCTTCG   | 647      | 56                      |
|               | Reverse | GAGTATCAGGCTTAGTGGC  |          |                         |
| BGIBMGA010516 | Forward | CATCCGAGGGAACAGACA   | 791      | 54                      |
|               | Reverse | TACCAACGGGAAACACGA   |          |                         |
| BGIBMGA010515 | Forward | GTTACGCACTACCGACAT   | 522      | 52                      |
|               | Reverse | TACCAACGGGAAATACG    |          |                         |
| BGIBMGA013193 | Forward | TGAAGAAGACCGTGGAAC   | 332      | 54                      |
|               | Reverse | GGCGTTTACTCTTATCCC   |          |                         |
| BGIBMGA009799 | Forward | CGGGAAGACCGTCACTCA   | 200      | 58                      |
|               | Reverse | CGTAGGGCTGCCAGAACA   |          |                         |
| BGIBMGA012152 | Forward | CCATTGACATTGGCTACCG  | 303      | 56                      |
|               | Reverse | CGTCCGAGAACTGGATTTT  |          |                         |
| BGIBMGA005710 | Forward | TAGCATCGGCTGTGGTCT   | 530      | 56                      |
|               | Reverse | TGCGGTCAGGAAACTCGTA  |          |                         |
| BGIBMGA012872 | Forward | TGAGCGAGAAACACCACT   | 644      | 52                      |
|               | Reverse | GTCCGCCAAACTTGAATA   |          |                         |
| BGIBMGA000158 | Forward | TTGAAGCAGGAACATACCC  | 395      | 54                      |
|               | Reverse | CAATAAGTTGTGCGTGGC   |          |                         |
